# Supplementary material for: Enteric Methane Emissions Prediction in Dairy Cattle and Effects of Monensin on Methane Emissions: A Meta-Analysis
Source: MDPI journal article supplement (doi:10.3390/ani13081392), 2023-04-18
Supplement: s1 [file s1]

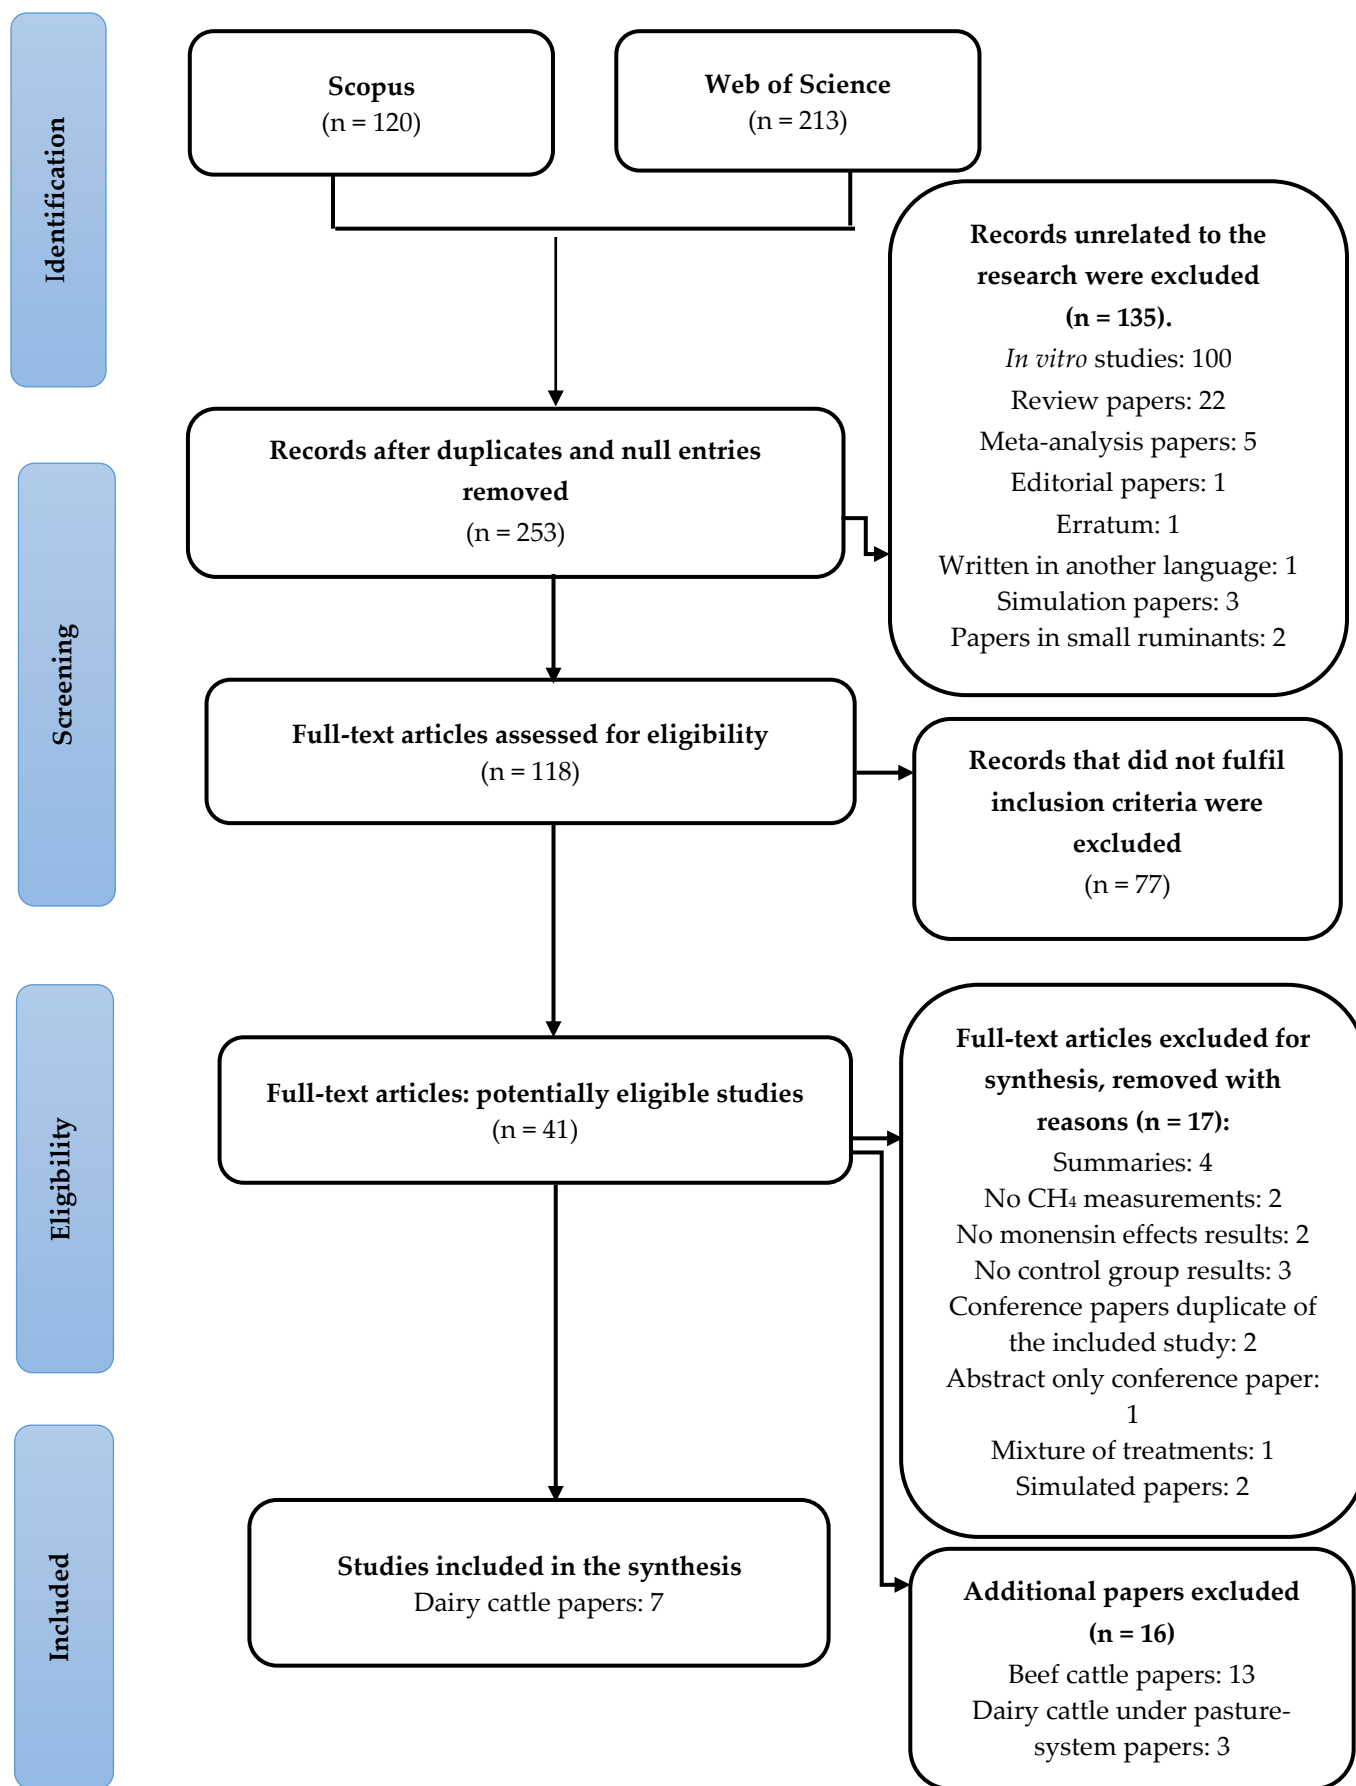

**Figure S1.** Flowchart illustrating the data searching, screening, and selection process used in the current study analysis.
